# Supplementary material
Source: publisher figshare collection journal article supplement (https://tandf.figshare.com/ndownloader/files/23234771)
Supplement: Supplementary file 1 [file 23234771]

**MM-GBSA calculations**

**Method**

The binding affinity of PDE4B-inhibitor complexes are studied using binding free energy calculations which were estimated using the MM-GBSA (Molecular Mechanics Generalized Born Surface Area) method (Genheden & Ryde 2015). Additionally, different components of the interaction energy that contribute to the binding were estimated. The entropy was not calculated, as we were interested in the comparative analysis of interaction parameters important to the inhibitor binding. Binding free energies (ΔGBind) of Ligands at catalytic cavity of protein was calculated as follows:

|  |  | **(1)** |
| --- | --- | --- |

Where, GComplex GProtein and GLigand is the free energy of complex, protein (PDE4B), and ligand, respectively. Free energy (ΔG) of each state was calculated as follows:

|  |  | **(2)** |
| --- | --- | --- |
|  |  | **(3)** |

Where EMM is the molecular mechanical energy, GGB is polar contribution towards solvation energy calculated by Generalized Born (GB) method respectively. GSA is the contribution from nonpolar terms towards solvation energy, and TS is the entropic contribution of the inhibitor. EMM was obtained by summing contributions from, electrostatic energy (Eele), vanderwaal energy (Evdw), and internal energy including bond, angle, and torsional angle energy (Eint) using the same force field as that of MD simulations. GGB was calculated with Onufriev's method (Onufriev, Bashford & Case 2004)). GSA in equation 2 is proportional to the solvent accessible surface area (SASA) and was computed by molsurf module using the equation 5.

|  |  | **(4)** |
| --- | --- | --- |

In equation 4, the surface tension proportionality constant (γ) was set to 0.0072 kcal/mol/Å2, while the free energy of nonpolar solvation for a point solute (b) was set to a default value. SASA was computed by molsurf using a fast algorithm called the Linear Combinations of Pairwise Overlaps (LCPO), which simply computes a surface area of two overlapping atoms by subtracting their overlapping region from the total area of their vdW surfaces (Weiser, Shenkin & Still 1999)). vdW radii in AMBER and GAFF force fields were used to define solute atoms which were then augmented by a probe sphere of 1.4Å for the molsurf computations. Binding free energy calculations were averaged over 500 frames taken at the interval of 100 ps over the last 50 ns of 100 ns production run.

**Results and discussion**

To compare the binding free energies of NPV in PDE4B with, **U-Cat** complex, or without UCR2domain *i.e.* **Cat complex**, we calculated MM-GB/SA energies of the two systems. The current comparative analysis involves a common inhibitor, NPV and we assumed that entropy have similar effects on both the similar complex structures. Therefore, we did not calculate the entropies for both the cases (**Table 1**).

The relative binding free energy (ΔGTotal) of the **U-Cat** and **Cat** complex are -35.54 (± 2.23) kcal/mol and -24.57 (± 2.6) kcal/mol respectively. It is encouraging to find that these energies were consistent with our MM-GBSA studies.
The electrostatic (Δ**E**Eel), van der Waals (Δ**E**vdw), the nonpolar component of the solvation energy (Δ**E**surf) and the polar component (Δ**E**GB) of solvation free energy (ΔGsolv), terms of the molecular mechanics energy were favourable for both the complex structures. The van der Waals component, **E**vdw (**U-Cat**: -53.49 and **Cat**: -44.21 kcal/mol), and the nonpolar component of the solvation energy, **E**surf (**U-Cat**: -6.65 and **Cat**: -5.52kcal/mol) showed the favorable contribution to the ligand protein complex formation. The total solvation energy, **ΔGsolv** (**U-Cat**: -211.70 and **Cat**: -131.76 kcal/mol) is strongly favourable at both complexes. Although the hydrophobic contribution to solvation free energy is very less yet the polar component played very crucial role.

Electrostatic interactions were supposed to play a foremost major role in the ligand and a protein interaction. But it is of high importance to consider the electrostatic component of the molecular mechanics energy together with the polar contribution to solvation while deciding the role of electrostatics in the ligand-protein complex formation. At both protein-ligand complexes, the nature of the polar component of the total solvation energy is similar and thus favourable for the bound state of the ligand but the on the contrary the electrostatic contribution, **E**Eel (**U-Cat**: 229.65 and **Cat**: 151.40 kcal/mol) does not play the expected significant role in the ligand complex interaction but this interaction were found to make a very small contribution to the binding free energy. The weakness of electrostatic interactions was surprising because of the conserved H-bond interaction between the invariant Gln615 and crystal ligands and reported inhibitors of PDE4B (Zhang et al. 2004; Wang, Robinson & Ke 2007). Apart from the energy contribution to the complex-stability, like other analyses, here also we observed the effect of N-terminal. All the contributing energy and the binding free energy showed lower value for **U-Cat** in comparison to the **Cat** protein complex.

**
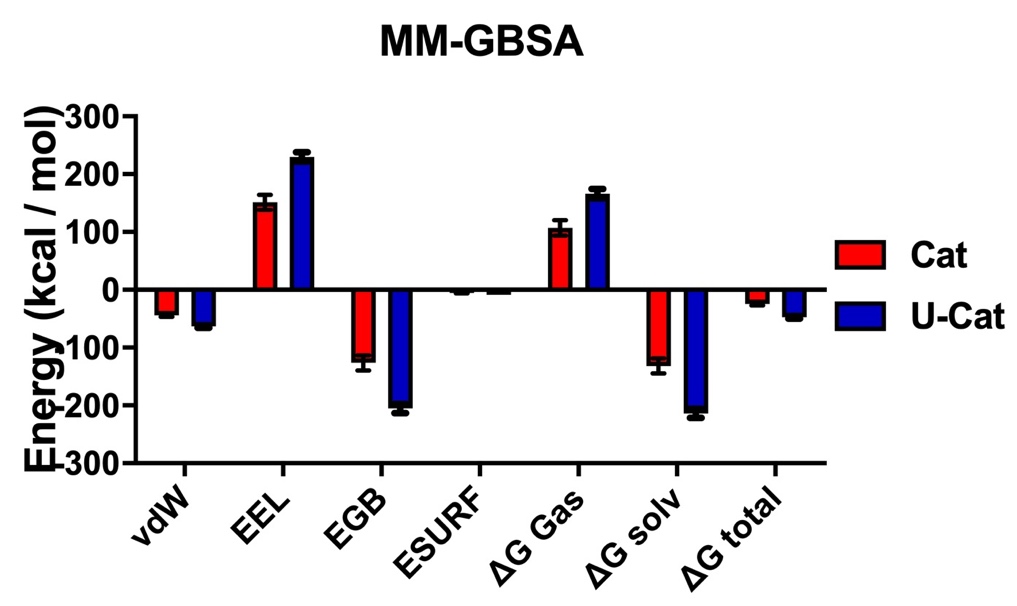
**

**Supplementray figure 1. MM-GBSA analysis of Cat and U-Cat versions of PDE 4B**

**References:**

Genheden, S. & Ryde, U. (2015). The MM/PBSA and MM/GBSA methods to estimate ligand-binding affinities. *Expert Opin Drug Discov* *10*: 449-461.

Onufriev, A., Bashford, D. & Case, D. A. (2004). Exploring protein native states and large-scale conformational changes with a modified generalized born model. *Proteins* *55*: 383-394.

Wang, H., Robinson, H. & Ke, H. (2007). The molecular basis for different recognition of substrates by phosphodiesterase families 4 and 10. *J Mol Biol* *371*: 302-307.

Weiser, J., Shenkin, P. S. & Still, W. C. (1999). Approximate solvent-accessible surface areas from tetrahedrally directed neighbor densities. *Biopolymers* *50*: 373-380.

Zhang, K. Y., Card, G. L., Suzuki, Y., Artis, D. R., Fong, D., Gillette, S., Hsieh, D., Neiman, J., West, B. L., Zhang, C., Milburn, M. V., Kim, S. H., Schlessinger, J. & Bollag, G. (2004). A glutamine switch mechanism for nucleotide selectivity by phosphodiesterases. *Mol Cell* *15*: 279-286.
